# Supplementary material for: Essential Oil-Loaded NLC for Potential Intranasal Administration
Source: MDPI journal article supplement (doi:10.3390/pharmaceutics13081166), 2021-07-28
Supplement: s1 [file s1]

# Supplementary Materials: Essential Oil-Loaded NLC for Potential Intranasal Administration

Angela Bonaccorso, Cinzia Cimino, Daniela Erminia Manno, Barbara Tomasello, Antonio Serra, Teresa Musumeci, Giovanni Puglisi, Rosario Pignatello and Claudia Carbone

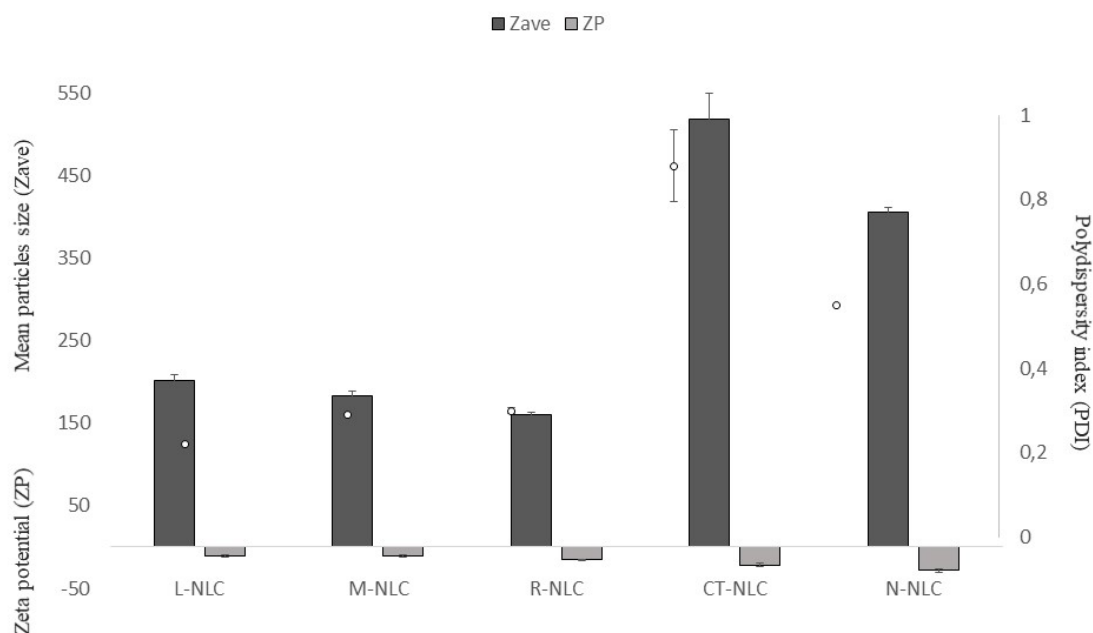

**Figure S1.** Mean particle size (Zave, nm), polydispersity index (PDI) and Zeta Potential (ZP)  $\pm$  standard deviation (SD) of the prepared Lavandula NLC (L-NLC), Mentha NLC (M-NLC), Rosmarinus NLC (R-NLC), Tegosoft CT NLC (CT-NLC) and Neem NLC (N-NLC) analysed after 30 days of storage in Turbiscan.

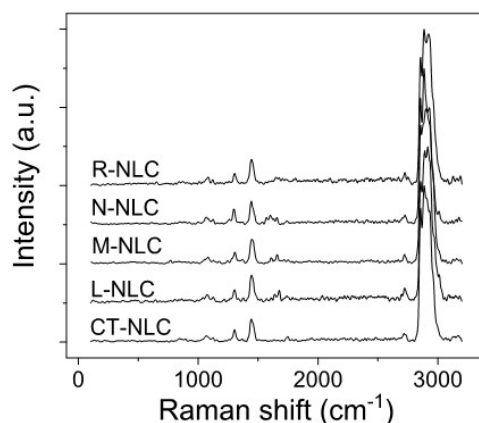

**Figure S2.** Raman spectra of all the prepared NLC.

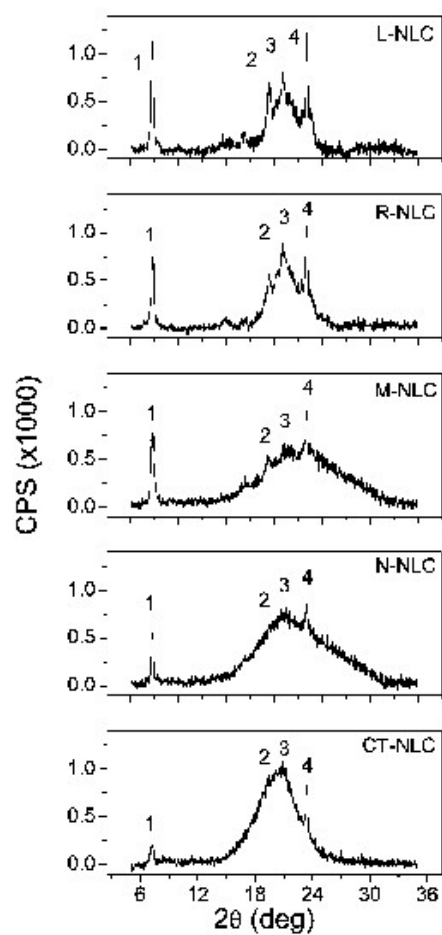

Figure S3. XRD spectra of all the prepared NLC.

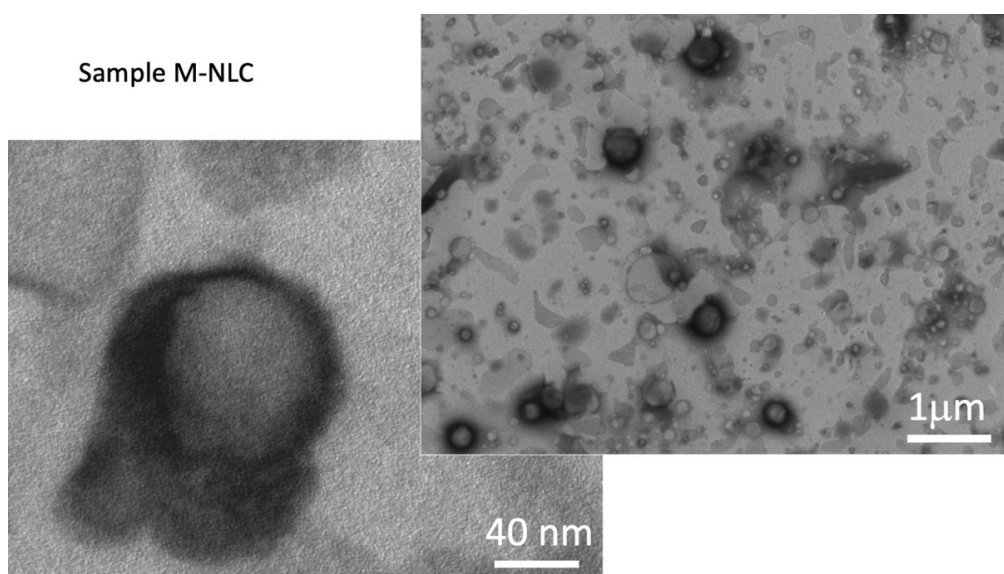

Figure S4. Transmission electron microscopy (TEM) images of NLC prepared using *Mentha* EO (M-NLC).

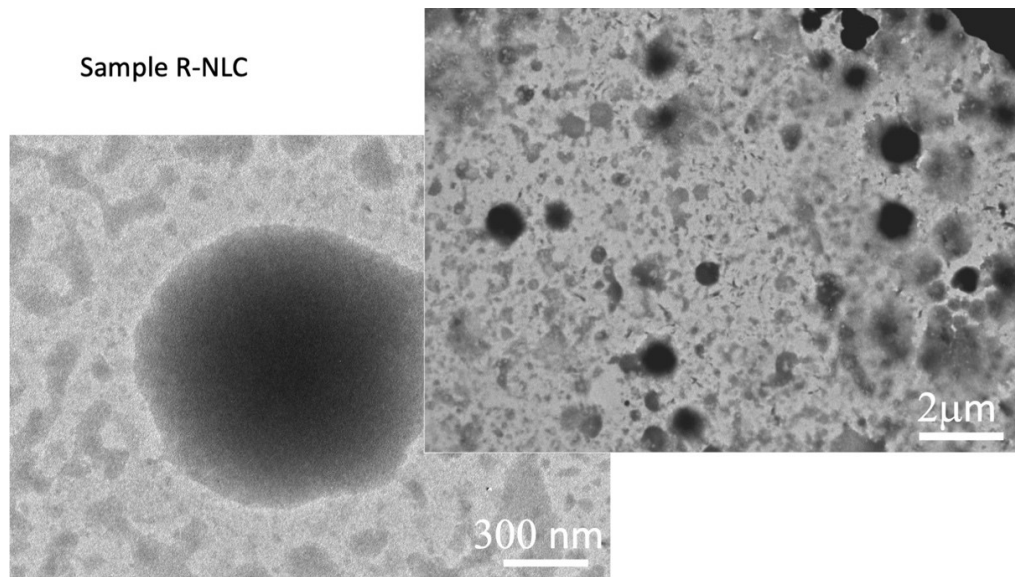

**Figure S5.** Transmission electron microscopy (TEM) images of NLC prepared using *Rosmarinus* EO (R-NLC).

**Table S1.** Raman parameters for the C-H stretching vibrational bands of NLC systems.

| Sample | peak position<br>( $\text{cm}^{-1}$ ) | FWHM<br>( $\text{cm}^{-1}$ ) | strength<br>(a.u.) |
|--------|---------------------------------------|------------------------------|--------------------|
| CT-NLC | 2853                                  | 19                           | 0.75               |
|        | 2883                                  | 27                           | 0.92               |
|        | 2912                                  | 25                           | 0.76               |
|        | 2937                                  | 22                           | 0.68               |
|        | 2962                                  | 19                           | 0.32               |
|        | 2986                                  | 36                           | 0.11               |
| L-NLC  | 2853                                  | 16                           | 0.49               |
|        | 2890                                  | 47                           | 0.95               |
|        | 2916                                  | 16                           | 0.29               |
|        | 2936                                  | 25                           | 0.71               |
|        | 2969                                  | 27                           | 0.38               |
|        | 3007                                  | 32                           | 0.17               |
| M-NLC  | 2852                                  | 15                           | 0.53               |
|        | 2881                                  | 19                           | 0.25               |
|        | 2907                                  | 60                           | 0.97               |
|        | 2934                                  | 22                           | 0.39               |
|        | 2961                                  | 23                           | 0.33               |
|        | 2983                                  | 48                           | 0.12               |
| N-NLC  | 2853                                  | 18                           | 0.64               |
|        | 2882                                  | 18                           | 0.40               |
|        | 2902                                  | 58                           | 0.76               |
|        | 2936                                  | 19                           | 0.22               |
|        | 2963                                  | 24                           | 0.20               |
|        | 3001                                  | 34                           | 0.06               |
| R-NLC  | 2853                                  | 18                           | 0.7                |
|        | 2881                                  | 27                           | 0.71               |
|        | 2923                                  | 50                           | 0.96               |
|        | 2966                                  | 12                           | 0.13               |
|        | 2978                                  | 47                           | 0.21               |
|        | 3010                                  | 30                           | 0.02               |
